# Supplementary material for: Effect of Drosophila suzukii on blueberry VOCs: chemical cues for a pupal parasitoid, Trichopria anastrephae
Source: Research Square preprint supplement (doi:10.21203/rs.3.rs-320923/v1), 2021-03-12
Supplement: Supplementary file 1 [file 1c669138f4d20d533cae0cea.xlsx]

## Sheet: GC-MS data
Effect of Drosophila suzukii on blueberry VOCs: chemical cues for a pupal parasitoid, Trichopria anastrephae (Hymenoptera: Diapriidae) de la Vega G.J., Triñanes F. & González A.
Table S1: Chromatography and mass spectral data for VOCs from maturing blueberries. Correlative numbers as in Table 1 and Figure 1. NIST and Adams refer to the the National Institute of Standards and Techonology and Adams’ (Adams 2007) mass spectrometry databases.
Correlative number	1			2			3			4			5			6			7			8			9			10			11			12			13			14			15			16			17
Compound name	Ethyl isobutanoate			Methyl 3-methylbutanoate			Ethyl butanoate			Methyl 3-methyl-2-butenoate			Ethyl 2-methyl-butanoate			Ethyl 3-methylbutanoate			1-Hexanol			Isoamyl acetate			Isopropyl 3-methylbutanoate			Ethyl 3-methyl-2-butenoate			cis-Anhydrolinalool oxide			D-Limonene			Cineole			Terpinolene			3-Methylbutyl 2-methylbutanoate			3-Methylbutyl 3-methylbutanoate			Phenylethyl alcohol
Retention time (min)	4.42			4.85			5.56 (shoulder)			6.92			7.08			7.24			7.98			8.01			8.64			9.63			12.4			13.06			13.13			15.02			15.45			15.57			16.04
Reported ret. index (source)	756 (NIST)			773 (NIST)			802 (NIST / Adams)			842 (NIST)			849 (NIST)			854 (NIST)			868 (NIST); 863 (Adams)			876 (NIST); 869 (Adams)			904 (NIST)			924 (NIST)			1008 (NIST); 1006 (Adams)			1018 (NIST); 1024 (Adams)			1032 (NIST); 1026 (Adams)			1088 (NIST); 1086 (Adams)			1101 (NIST); 1100 (Adams)			1104 (NIST); 1102 (Adams)			1116 (NIST); 1106 (Adams)
MS Similarity index (library)	92 (NIST)			96 (NIST)			93 (NIST)			93 (NIST)			96 (NIST)			93 (NIST)			93 (NIST)			97 NIST			89 (NIST)			94 (NIST)			87 (Adams)			91 (NIST)			89 (NIST)			94 (NIST)			95 (NIST)			97 (NIST)			97 (NIST)
Mass spectrum table	m/z	Relative Int.		m/z	Relative Int.		m/z	Relative Int.		m/z	Relative Int.		m/z	Relative Int.		m/z	Relative Int.		m/z	Relative Int.		m/z	Relative Int.		m/z	Relative Int.		m/z	Relative Int.		m/z	Relative Int.		m/z	Relative Int.		m/z	Relative Int.		m/z	Relative Int.		m/z	Relative Int.		m/z	Relative Int.		m/z
	39	7.94		30.95	1.56		30	1.32		31.95	2.1		30	1.08		31.95	0.95		30.95	14.61		31.85	0.09		31.95	1.42		39	13.14		31.95	0.37		31.95	0.07		31.95	0.43		31.95	0.44		31.95	0.44		31.9	0.09		30.95
	40	1.49		38	0.9		30.95	1.32		38	1.44		30.95	0.61		39	15.35		31.95	3.45		38.95	7.93		39	30.28		39.95	3.17		39	21.82		38	0.77		39	4.56		39	13.27		39	6.82		39	5.45		31.95
	41	28.56		39	9.97		38	1.32		39	16.38		38	0.37		40	4.78		39	9.7		39.95	1.51		41	39.22		41	3.93		39.95	4.02		39	16.79		41	15.59		39.95	4.52		39.95	1.14		39.95	0.96		38
	42	13.97		40	1.52		39	8.32		39.95	3.29		39	5.74		41	34.15		39.95	2.88		40.95	15.48		42	42.33		42	1.57		41	23.63		40	5.79		42	1.36		41	13.7		41	27.91		41	18.84		39
	43	100		41	23.31		40	1.45		41	3.36		40	0.96		42	13.79		41	34.99		41.95	16.37		43	80.52		43	4.25		42	8.77		41	17.66		43	100		43	10.07		42	11.37		42	10.79		39.95
	44	4.04		42	7.4		41	28.3		42	1.18		41	37.56		43	28.54		42	30.47		42.95	100		43.95	1.97		43.95	0.7		43	30.43		42	3.16		43.95	2.4		43.95	0.5		43	47.91		43	30.64		41
	45	10.07		43	33.52		42	16.79		43	4.14		42	2.25		43.95	2.03		43	43.29		43.95	3.66		56.05	4.75		45	2.53		43.95	0.98		43	3.1		54	13.22		51	8.7		43.95	1.86		44	1.48		43.95
	55	5.03		44	1.79		43	96.55		43.95	0.37		43	2.91		45	16.06		43.95	4.2		44.95	2.22		57.05	64.97		51	2.68		51	2.95		43.95	0.09		55	38.97		52	4.96		53	3.19		45	1.95		50
	56	1.45		45	1.72		44	3.48		50	2.84		44	0.47		55.05	8.85		45	5.36		53	1.95		59.05	14.6		53	8.52		53	12.71		50	1.78		56	1.94		53	11.43		55	31.08		51	0.19		51
	57.05	4.94		51	0.74		45	12.85		51	3.62		45	7.67		56.05	8.55		51	1.11		54	1.44		60	61.92		54.05	8.18		54	5.85		51	6.36		58	13.88		55.05	8.52		56.05	9.72		53	0.73		52
	59	1.12		53	1.47		51	0.06		53	11.5		47	0.77		57.05	63.65		53	5.4		55	45.96		85.05	100		55.05	37.24		55	57.27		52	3.35		59	17.39		56.05	0.56		57.05	70.19		54	1.25		53
	69	2.25		55.05	3.1		53	0.54		54	6.9		50	0.34		58.05	4.8		55	48.06		56	2.73		87.05	29.28		56.05	3.99		56.05	2.79		53.05	21.46		69.05	47.72		57.05	1.23		58.05	3.76		55	23.58		62
	70.05	11.22		56.05	3.77		54.05	0.37		55.05	44.07		51	0.52		59.05	13.82		56	100		57	2.07		102.1	35.25		57.05	2.26		57.05	0.93		54.05	1.65		70.05	1.65		63	2.81		69.05	8.78		56.05	3.56		63
	71.05	65.09		57.05	23.62		55	8.78		56.05	3.5		53.05	1.24		60	39		57	2.82		58	2.36		103.1	41.58		59	2.21		65.05	7.79		55.05	7.47		71.05	57.51		65	11.96		70.05	100		57.05	36.6		64.05
	72.05	4.5		58.05	1.78		56.05	7.5		57.05	0.8		54.05	0.56		61	21.81		67	5.56		61	12.81					67	2.31		67.05	100		56.05	1.01		81.05	79.47		67.05	11.4		71.05	35.2		58.05	1.56		65.05
	73	13.08		59	34.15		59.05	0.59		59	4.45		55.05	7.08		69.05	6.01		69.05	35.6		69.05	6.12					69	1.42		68.05	55.97		57.05	4.58		82.05	18.19		77.05	32.06		74	5.12		59	2.19		66.05
	86.1	0.16		60.05	1.22		60	18.1		67	2.47		56.05	14.91		70	33.75		70.05	3.65		70.05	54.51					73.05	2.31		69.05	13.56		58	1		83.05	33.79		78.05	7.45		84.1	4.53		60	3.88		74
	87.05	1.1		69	7.76		61	8.94		69	2.51		57.05	100		71.05	2.98		84.05	6.06		71.05	4.48					82.05	37.18		71.05	10.05		62	0.46		84.1	58.09		79.05	40.22		85.05	47		61	2.59		77.05
	88.05	27.81		73.05	3.8		67.05	0.37		71.05	2.61		58.05	4.73		73.05	9.13					73	7.65					83.05	100		77	7.86		63.05	2.3		85.05	3.18		80.05	7.81		86.05	3.44		69.05	3.45		78.05
	89.05	9.63		74.05	100		69.05	0.45		82.05	15.74		59.05	1.24		85.05	72.76					85.05	1.39					84.05	6.81		79.05	16.09		64.05	0.47		93.05	12.25		91.1	58.07		87.05	4.27		70.05	100		79.05
	96.05	0.29		75.05	4.46		70.05	21.21		83.05	100		69	1.52		86.1	7.22					87.05	10.61					85.05	22.81		81.05	18.53		65.05	9.07		95.1	17.58		92.1	14.82		103.1	19.31		71.05	25.11		89.05
	101.1	5.49		83.05	1.24		71.05	100		84.05	6.55		70.05	0.38		87.1	17.38					88.05	1.65					86.05	2.36		82.05	25.7		66.05	3.45		96.1	29.74		93.1	100		113.15	3.75		72.05	1.82		90.05
	116.1	19.23		85.1	27.87		72.05	4.41		99.05	8.45		71.05	0.54		88.1	100											99.1	2.36		83.05	6.28		67.05	84.58		97.1	14.73		94.1	11.19		115.1	2.65		84.05	0.49		91.05
	117.1	2.59		86.1	1.65		73	21.16		114.1	39.84		73.05	8.23		89.05	5.14											100.05	21.65		91.05	9.47		68.05	100		108.1	66.55		103.1	5.95					85.05	55.15		92.05
				97	0.36		84.1	4.95		115.1	3.05		74.05	26.75		103.1	4.69											113.1	12.56		93.05	12.13		69.05	7.29		109.1	8.87		105.1	28.41					86.05	3.8		93.1
				101.1	16.88		85.1	15.43					75.05	2.93		115.15	14.17											128.15	27.07		95.1	14.64		77.05	21.25		111.1	54.1		106.1	6.79					87.05	6.35		103.1
				102.1	1.05		86.1	0.22					84.05	2.13														129.1	2.37		96.1	23.48		78.05	5.15		112.1	7.02		107.1	18.25					88.05	0.81		104.1
				115.1	0.76		87.05	1.02					85.05	41.32														206.95	0.85		109.1	13.34		79.05	42.61		125.1	19.45		108.15	6.31					97.05	1.02		120.1
				116.15	1.23		88.05	57.14					86.05	2.32																	110.1	16.11		80.05	14.61		126.15	6.8		115.1	4.94					99.1	0.37		122.1
							89.05	15.83					87.05	16.22																	119.1	6.44		81.1	10.78		139.15	51.08		117.1	5.67					102.1	1.51		123.15
							90.05	0.74					88.05	1.26																	123.1	6.1		82.1	2.28		140.15	7.88		119.15	13.51					103.1	14.74		207
							96.05	0.14					101.1	1.71																	137.15	14.33		89.05	0.77		154.15	40.04		121.15	79.14					104.05	0.8
							101.1	9.81					102.1	74.2																	207	5.78		91.1	27.71		206.95	0.01		122.15	9.11					105.05	0.62
							116.1	4.67					103.1	8.11																				92.1	30.91					134.2	2.71					115.1	3.31
							117.1	1.15					104.1	0.63																				93.1	84.35					136.2	73.9					129.1	2.78
													115.1	10.89																				94.1	42.92					137.2	9.16					130.15	1.44
													116.1	0.73																				95.1	10.85											206.95	0.72
													130.15	1.43																				96.1	0.84
													131.15	0.53																				99.15	0.49
													206.95	0.08																				103.1	2.03
																																		104.1	0.49
																																		105.1	8.35
																																		106.1	2.52
																																		107.15	26.51
																																		108.15	7.19
																																		109.15	0.45
																																		115.1	1.62
																																		117.1	1.54
																																		119.15	3.71
																																		120.15	0.45
																																		121.2	27.19
																																		122.15	2.72
																																		134.2	0.9
																																		136.2	26.97
																																		137.2	2.97
[truncated: 15 more columns]
